# Supplementary material
Source: HighWire-hosted journal article supplement (doi:10.1101/rna.079273.122)
Supplement: Supplemental_Legends_Table.docx [file Supplemental_Legends_Table.docx]

Supplementary Legends and Table

**Supplementary Figure 1.** Multiple sequence alignments of spliceosomal proteins against diverse eukaryotes. Alignments of Cm proteins were as follows: Brr2 (A), Bud31 (B), Cef1 (C), Cus1 (D), Hsh49 (E), Mud2 (F), Prp2 (G), Prp3 (H), Prp5 (I), Prp8 (J), Prp11 (K), Prp19 (L), Prp21 (M), Prp31 (N), Prp38 (O), Prp46 (P), Rse1 (Q), and Yju2 (R). Boxed regions highlight motifs or domains that are conserved (green) or absent (red) in Cm.

**Supplementary Figure 2.** Multiple sequence alignments of spliceosomal proteins. (A) The CmPrp8 C-terminus does not include the conserved Jab1 tail domain. (B) CmBrr2 lacks the N-terminal helicase domain as well as the DEAD-like H Box and Sec63 domains of the C-terminal cassette. (C) CmRse1 has an N-terminal 300 amino acid insertion, which is predicted to be highly disordered. (D) CmPrp19 is predicted to contain only the canonical Prp19 domain.

Supplementary Table 1. Genome accession numbers and statistics for Figure 1.

| Genus | Species | Group | GenBank Assembly Accession | Genome Size (Mb) | Gene Number | Introns Estimate | Introns/gene |
| --- | --- | --- | --- | --- | --- | --- | --- |
| Saccharomyces | cerevisiae | Fungi | [GCA_000146045.2](https://www.ncbi.nlm.nih.gov/assembly/GCA_000146045.2) | 12.16 | 6003 | 295 | 0.049 |
| Candida | albicans | Fungi | [GCA_000182965.3](https://www.ncbi.nlm.nih.gov/assembly/836151) | 14.28 | 6030 | 402 | 0.067 |
| Schizosaccharomyces | pombe | Fungi | [GCA_000002945.2](https://www.ncbi.nlm.nih.gov/assembly/245818) | 12.59 | 5132 | 5298 | 1.032 |
| Rhizopus | delemar | Fungi | [GCA_000149305.1](https://www.ncbi.nlm.nih.gov/assembly/172288) | 46.15 | 17459 | 40515 | 2.321 |
| Piptocephalis | cylindrospora | Fungi | [GCA_003614145.1](https://www.ncbi.nlm.nih.gov/assembly/2007781) | 10.75 | 4301 | 8652 | 2.012 |
| Allomyces | macrogynus | Fungi | [GCA_000151295.1](https://www.ncbi.nlm.nih.gov/assembly/174658) | 57.06 | 19447 | 47748 | 2.455 |
| Encephalitozoon | cuniculi | Microsporidia | [GCA_000091225.1](https://www.ncbi.nlm.nih.gov/assembly/256118) | 2.5 | 1996 | 37 | 0.019 |
| Mitosporidium | daphniae | Microsporidia | [GCA_000760515.2](https://www.ncbi.nlm.nih.gov/assembly/6095561) | 5.64 | 3322 | 4209 | 1.267 |
| Paramicrosporidium | saccamoebae | Microsporidia | [GCA_002794465.1](https://www.ncbi.nlm.nih.gov/assembly/1532401) | 7.19 | 3766 | 3183 | 0.845 |
| Rozella | allomycis | Fungi | [GCA_000442015.1](https://www.ncbi.nlm.nih.gov/assembly/62571) | 11.86 | 6350 | 20678 | 3.256 |
| Fonticula | alba | Other | [GCA_000388065.2](https://www.ncbi.nlm.nih.gov/assembly/160791) | 31.3 | 6309 | 24382 | 3.865 |
| Homo | sapiens | Animal | [GCA_000001405.29](https://www.ncbi.nlm.nih.gov/assembly/11968211) | 3272.09 | 26594 | 207344 | 7.797 |
| Caenorhabditis | elegans | Animal | [GCA_000002985.3](https://www.ncbi.nlm.nih.gov/assembly/554278) | 100.29 | 28389 | 166335 | 5.859 |
| Trichoplax | adhaerens | Animal | [GCA_000150275.1](https://www.ncbi.nlm.nih.gov/assembly/173428) | 105.63 | 11520 | 85528 | 7.424 |
| Capsaspora | owczarzaki | Other | [GCA_000151315.2](https://www.ncbi.nlm.nih.gov/assembly/714148) | 27.97 | 8792 | 33828 | 3.848 |
| Entamoeba | histolytica | Amoebozoa | [GCA_000208925.2](https://www.ncbi.nlm.nih.gov/assembly/279448) | 20.84 | 8163 | 2542 | 0.311 |
| Dictyostelium | discoideum | Amoebozoa | [GCA_000004695.1](https://www.ncbi.nlm.nih.gov/assembly/255488) | 34.21 | 13315 | 16910 | 1.270 |
| Cyanidioschyzon | merolae | Red Algae | [GCA_000091205.1](https://www.ncbi.nlm.nih.gov/assembly/111838) | 16.54 | 4803 | 38 | 0.008 |
| Galdieria | sulphuraria | Red Algae | [GCA_000341285.1](https://www.ncbi.nlm.nih.gov/assembly/548638) | 13.71 | 7174 | 15629 | 2.179 |
| Chondrus | crispus | Red Algae | [GCA_000350225.2](https://www.ncbi.nlm.nih.gov/assembly/45091) | 104.98 | 9807 | 6835 | 0.697 |
| Micractinium | conductrix | Green Algae | [GCA_002245815.2](https://www.ncbi.nlm.nih.gov/assembly/1643361) | 61.02 | 10070 | 133478 | 13.000 |
| Auxenochlorella | protothecoides | Green Algae | [GCA_000733215.1](https://www.ncbi.nlm.nih.gov/assembly/202031) | 22.92 | 7014 | 33109 | 4.720 |
| Chlamydomonas | reinhardtii | Green Algae | [GCA_000002595.3](https://www.ncbi.nlm.nih.gov/assembly/1535831) | 120.41 | 14488 | 107036 | 7.388 |
| Pycnococcus | provasolii | Green Algae | [GCA_015473125.1](https://www.ncbi.nlm.nih.gov/assembly/8540361) | 22.7 | 11330 | 11000 | 1.000 |
| Arabidopsis | thaliana | Plant | [GCA_000001735.2](https://www.ncbi.nlm.nih.gov/assembly/1733481) | 119.67 | 48265 | 271373 | 5.623 |
| Guillardia | theta | Cryptophyte | [GCA_000315625.1](https://www.ncbi.nlm.nih.gov/assembly/503988) | 87.15 | 24822 | 135298 | 5.451 |
| Toxoplasma | gondii | SAR | [GCA_000006565.2](https://www.ncbi.nlm.nih.gov/assembly/47471) | 65.67 | 7987 | 34936 | 4.374 |
| Plasmodium | falciparum | SAR | [GCA_000002765.3](https://www.ncbi.nlm.nih.gov/assembly/5330671) | 23.33 | 5387 | 8409 | 1.561 |
| Cryptosporidium | andersoni | SAR | [GCA_001865355.1](https://www.ncbi.nlm.nih.gov/assembly/874641) | 9.09 | 3876 | 1704 | 0.440 |
| Tetrahymena | thermophila | SAR | [GCA_000189635.1](https://www.ncbi.nlm.nih.gov/assembly/246048) | 103.01 | 26996 | 94201 | 3.489 |
| Phaeodactylum | tricornutum | SAR | [GCA_000150955.2](https://www.ncbi.nlm.nih.gov/assembly/429028) | 27.45 | 10408 | 8356 | 0.803 |
| Phytophthora | infestans | SAR | [GCA_000142945.1](https://www.ncbi.nlm.nih.gov/assembly/165248) | 228.54 | 17797 | 31784 | 1.786 |
| Blastocystis | hominis | SAR | [GCA_000151665.1](https://www.ncbi.nlm.nih.gov/assembly/175048) | 18.82 | 6020 | 15203 | 2.525 |
| Leishmania | donovani | Kinetoplastid | [GCA_000227135.2](https://www.ncbi.nlm.nih.gov/assembly/405068) | 32.45 | 8014 | 9 | 0.001 |
| Phytomonas | sp. | Kinetoplastid | [GCA_000582765.1](https://www.ncbi.nlm.nih.gov/assembly/124201) | 17.78 | 6381 | 0 | 0.000 |
| Trypanosoma | cruzi | Kinetoplastid | [GCA_000209065.1](https://www.ncbi.nlm.nih.gov/assembly/271508) | 89.98 | 19607 | 3 | 0.000 |
| Perkinsela | sp. | Kinetoplastid | [GCA_001235845.1](https://www.ncbi.nlm.nih.gov/assembly/455291) | 9.48 | 5252 | 0 | 0.000 |
| Naegleria | gruberi | Excavate | [GCA_000004985.1](https://www.ncbi.nlm.nih.gov/assembly/325148) | 40.96 | 15711 | 10882 | 0.693 |
| Giardia | intestinalis | Excavate | [GCA_000002435.2](https://www.ncbi.nlm.nih.gov/assembly/5197591) | 12.08 | 5093 | 14 | 0.003 |
| Trichomonas | vaginalis | Excavate | [GCA_000002825.1](https://www.ncbi.nlm.nih.gov/assembly/283148) | 176.42 | 59679 | 66 | 0.001 |
